# Supplementary material for: Tunable J-type aggregation of silicon phthalocyanines in a surface-anchored metal–organic framework thin film
Source: Royal Society of Chemistry journal article supplement (doi:10.1039/d3cp01865b), 2023-01-01
Supplement: d3cp01865b1.pdf [file d3cp01865b1.pdf]

## **Tunable J-type aggregation of silicon phthalocyanines in surface-anchored metal-organic framework thin film**

Hongye Chen,<sup>a</sup> Luis Martín-Gomis,<sup>b</sup> Zhiyun Xu,<sup>a</sup> Jan C Fischer,<sup>c</sup> Ian A Howard,<sup>c</sup> David Herrero,<sup>b</sup> Víctor Sobrino-Bastán,<sup>b</sup> Ángela Sastre-Santos<sup>b\*</sup>, Ritesh Haldar,<sup>d\*</sup> and Christof Wöll<sup>a\*</sup>

<sup>a</sup>Institute of Functional Interfaces (IFG), Karlsruhe Institute of Technology (KIT), 76344 Eggenstein-Leopoldshafen (Germany).

<sup>b</sup>Área de Química Orgánica, Instituto de Bioingeniería, Universidad Miguel Hernández, Avda Universidad S/N, 03202, Elche, Spain.

<sup>c</sup>Institute of Microstructure Technology, Karlsruhe Institute of Technology (KIT), 76344 Eggenstein-Leopoldshafen (Germany).

<sup>d</sup>Tata Institute of Fundamental Research Hyderabad, Gopanpally, Hyderabad 500046, India

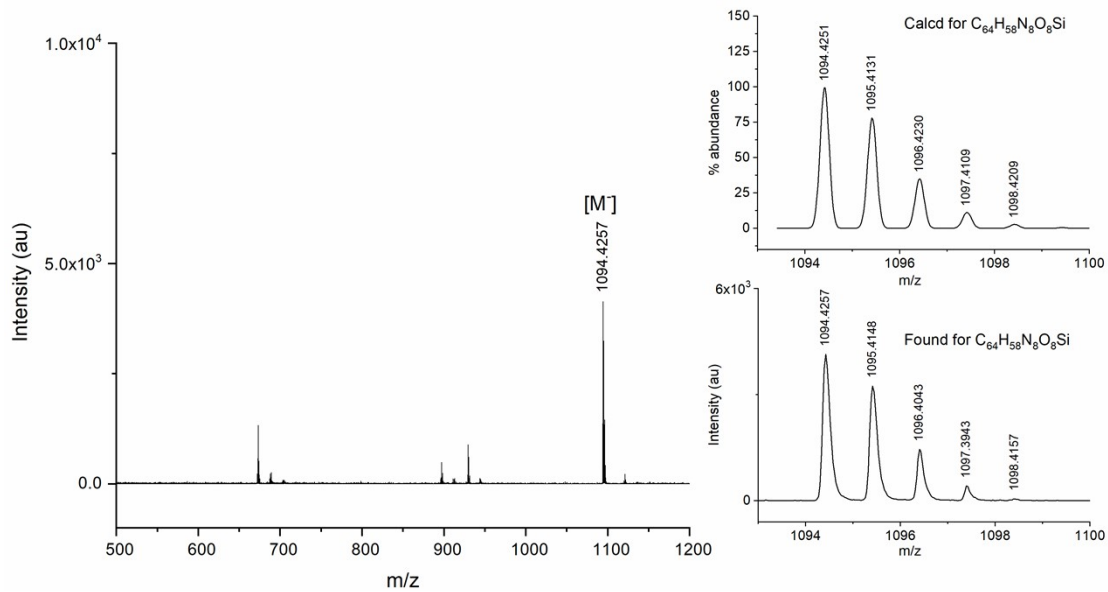

Fig. S1 HR-MS MALDI ToF spectra of SiPc 2.

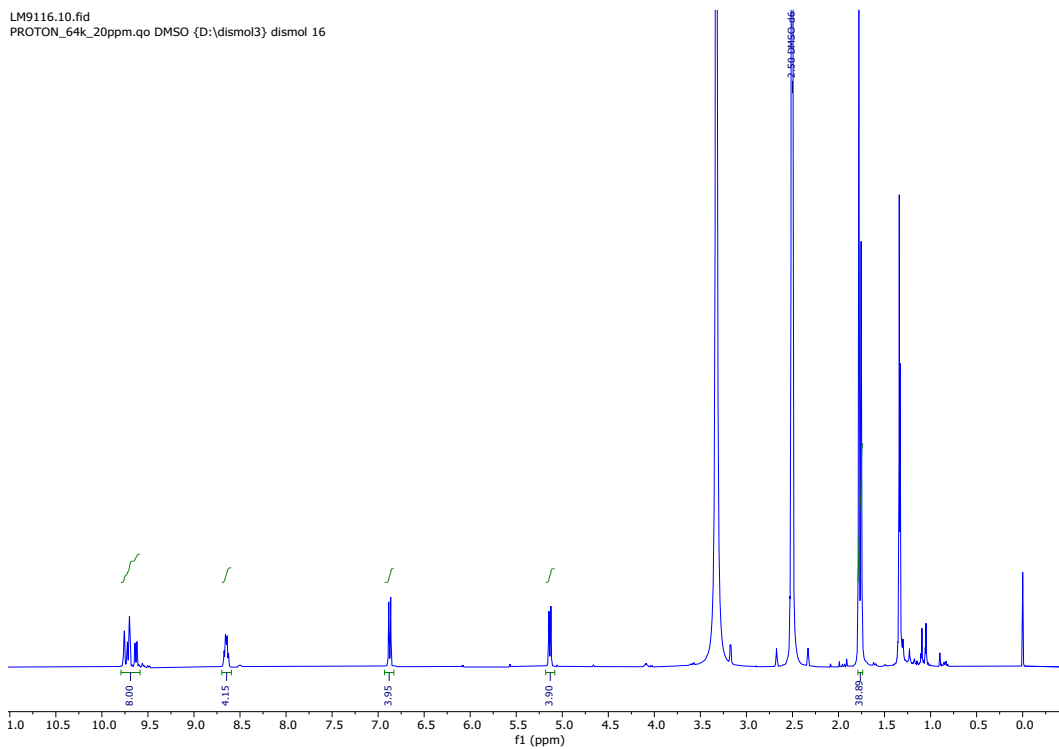

Fig. S2  $^1H$  NMR spectrum of SiPc 2.

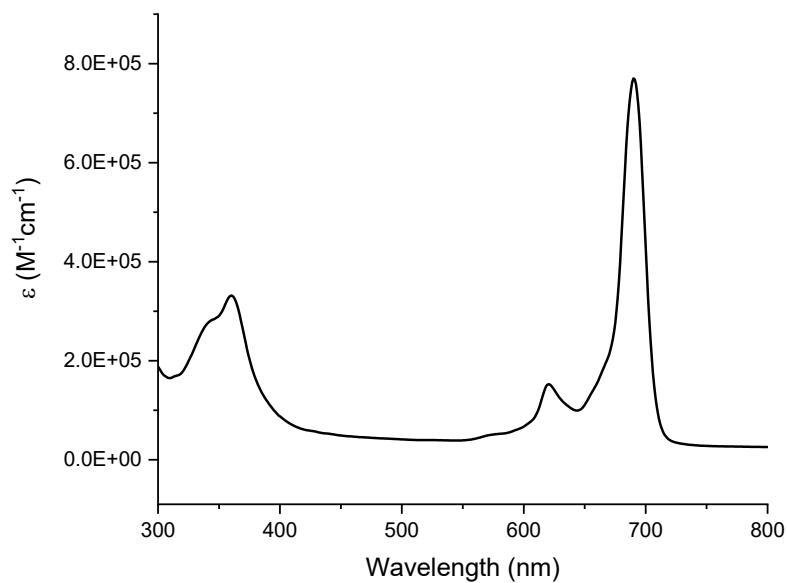

Fig. S3 UV-Vis spectrum of SiPc 2.

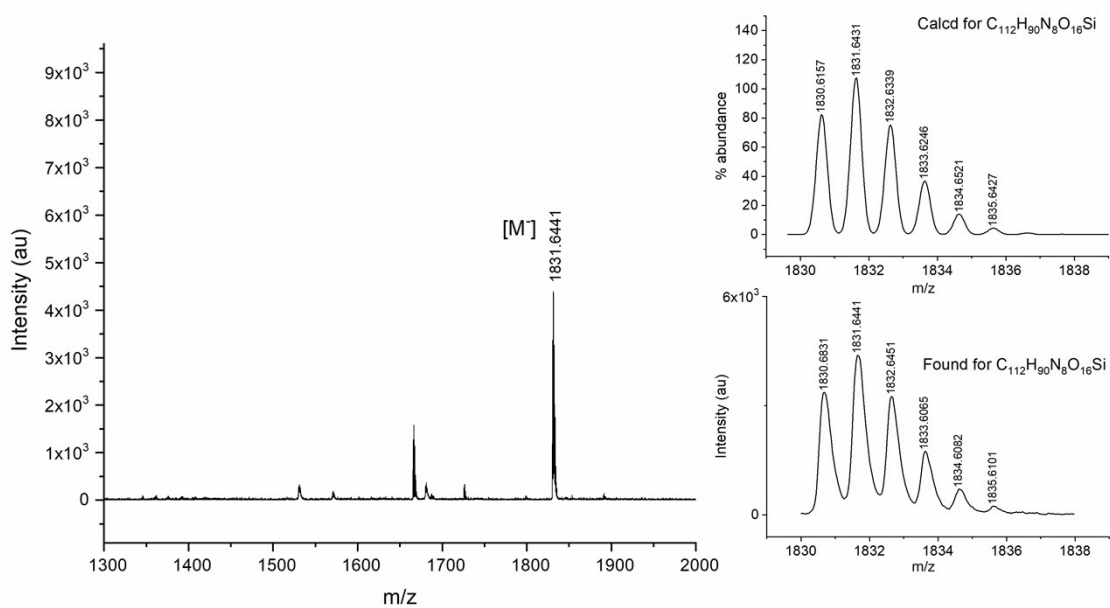

Fig. S4 HR-MS MALDI ToF spectra of SiPc 3.

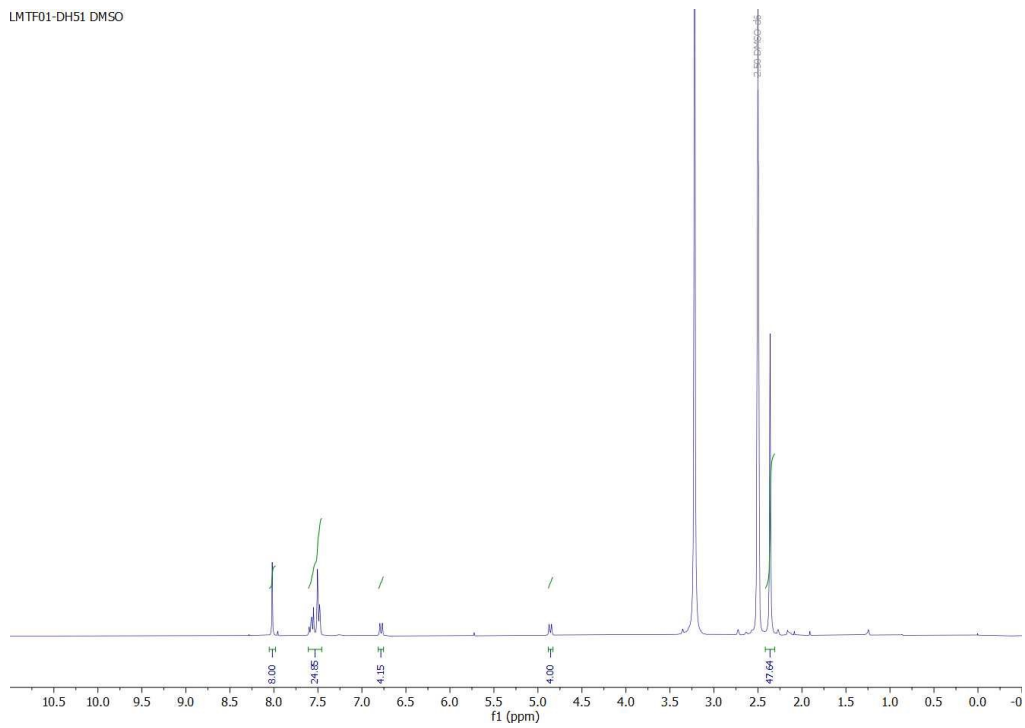

Fig. S5  $^1\text{H}$  NMR spectrum of **SiPc 3**.

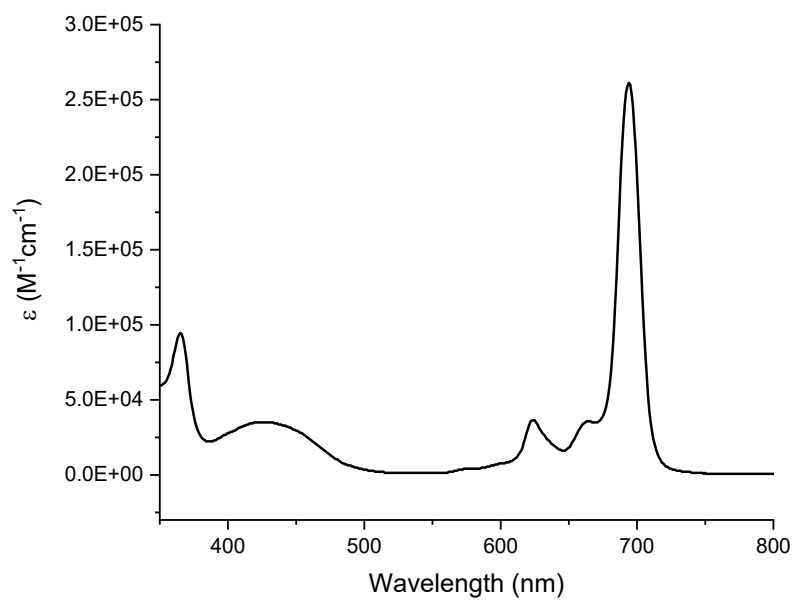

Fig. S6 UV-Vis spectrum of **SiPc 3**.

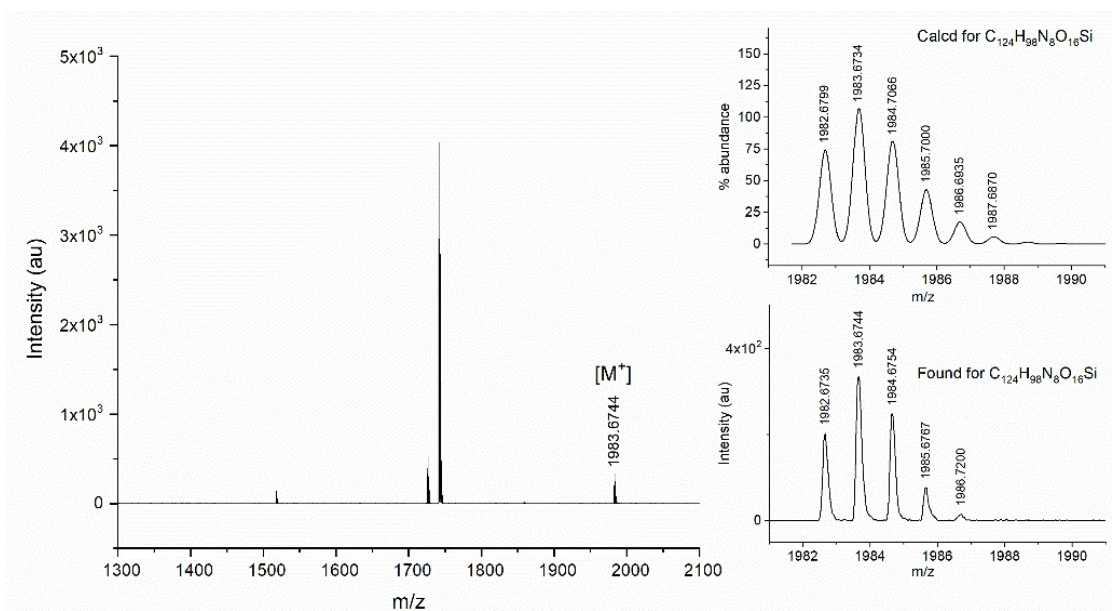

Fig. S7 HR-MS MALDI ToF spectra of SiPc 4.

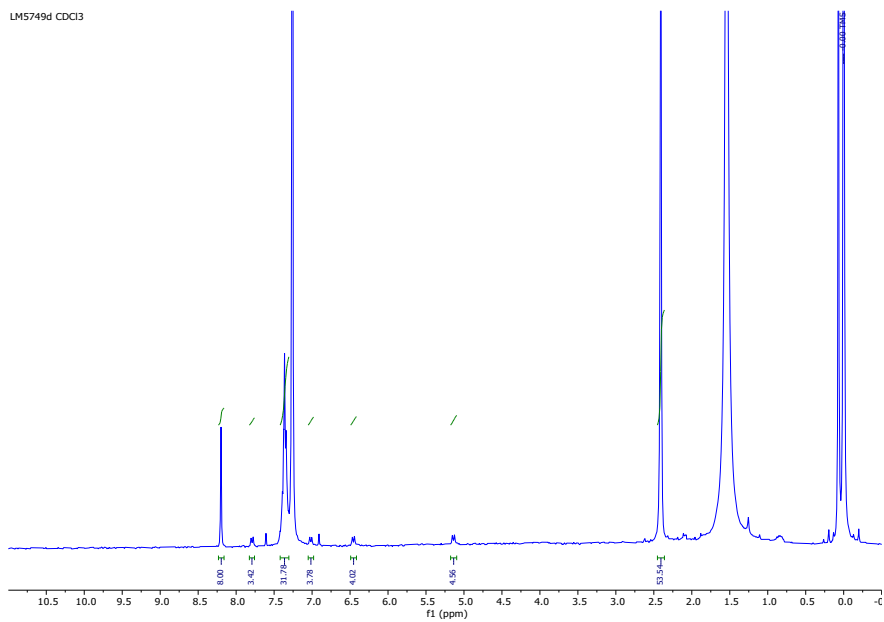

Fig. S8  $^1H$  NMR spectrum of SiPc 4.

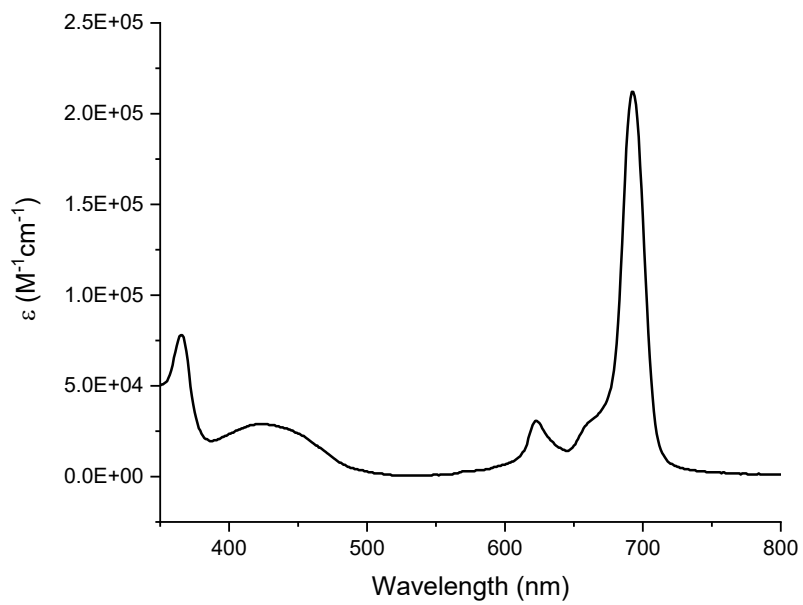

Fig. S9 UV-Vis spectrum of **SiPc 4**.

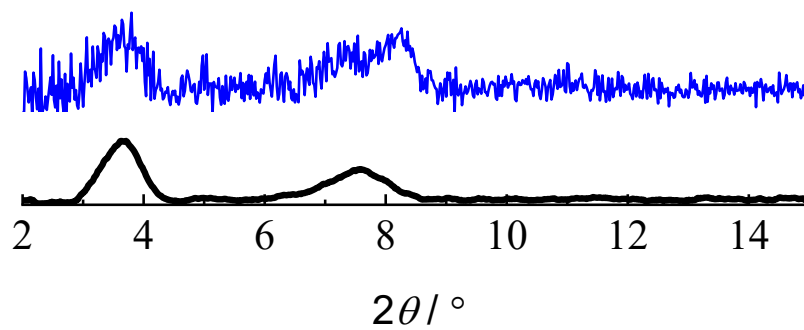

Fig. S10 Out (black) and in-plane (blue) x-ray diffraction patterns of **SiPc 2**.

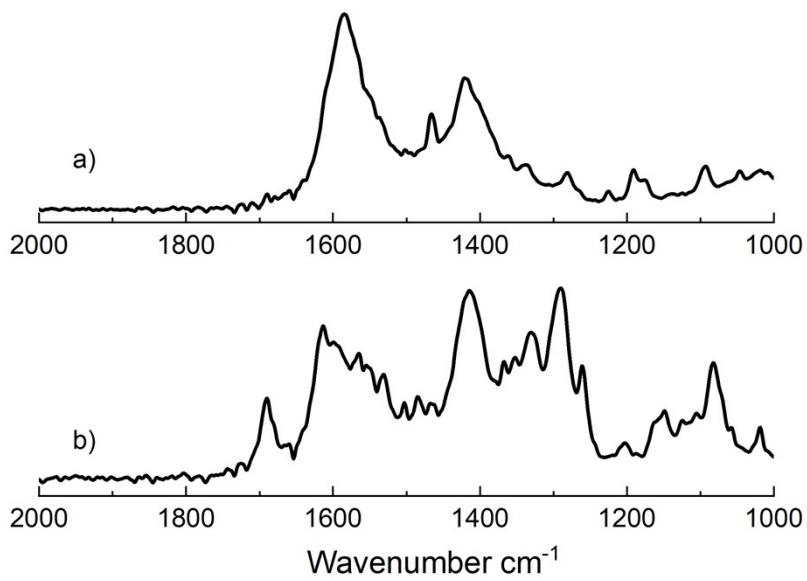

Fig. S11 FT-IRRAS spectra of Zn-SiPc **2** and **4**.

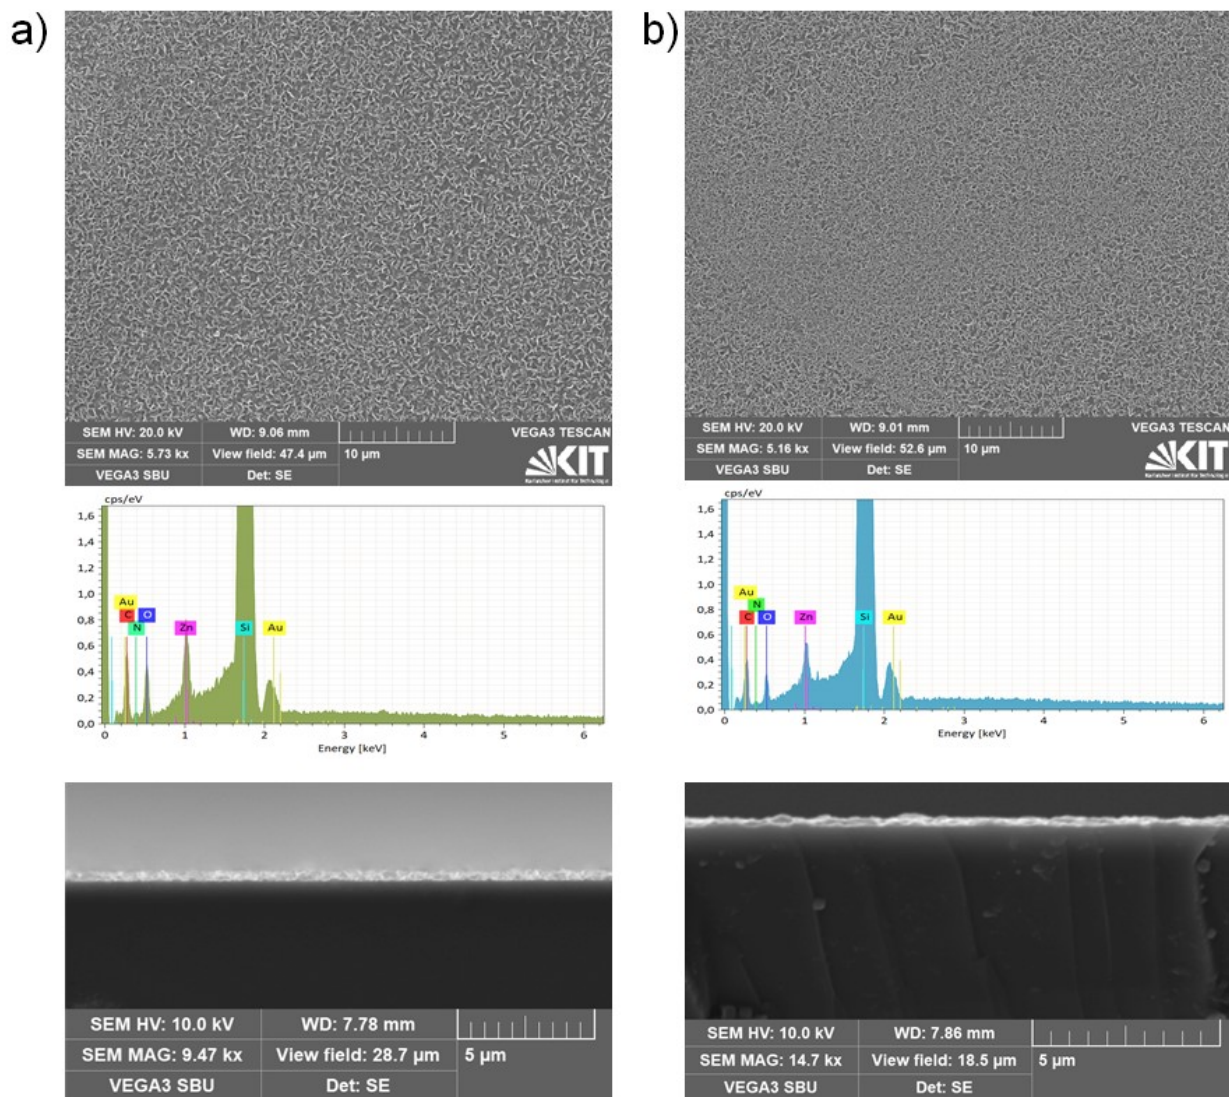

Fig. S12 SEM images of a) Zn-SiPc 2 and b) 4 grown on Si/SiO<sub>2</sub> substrate (top panel: morphology, middle panel: shows elemental analysis results, bottom panel: cross section).
